# Supplementary material for: The relationship between the secondary structure and the emulsifying ability of protein-based particles and the Pickering emulsions stabilized by the zein–lysine complex
Source: Royal Society of Chemistry journal article supplement (doi:10.1039/d4sm00394b), 2024-01-01
Supplement: d4sm00394b1.pdf [file d4sm00394b1.pdf]

Support information

## The Relationship between Secondary Structure and the Emulsifying Ability of Protein-based Particles and the Pickering Emulsions Stabilized by Zein-Lysine Complex

Yijie Wang, Yunze Tian, Yunpeng Xie, Yue Sun, Ting Li, Xuhui Zhang, Yang Wang, Jing Huang, Bihua Xia, Shibo Wang, Weifu Dong\*

\* Corresponding author. E-mail: wfdong@jiangnan.edu.cn.

The Key Laboratory of Synthetic and Biological Colloids, School of Chemical and Material Engineering, Jiangnan University, 1800 Lihu Road, Wuxi, 214122, Jiangsu, China

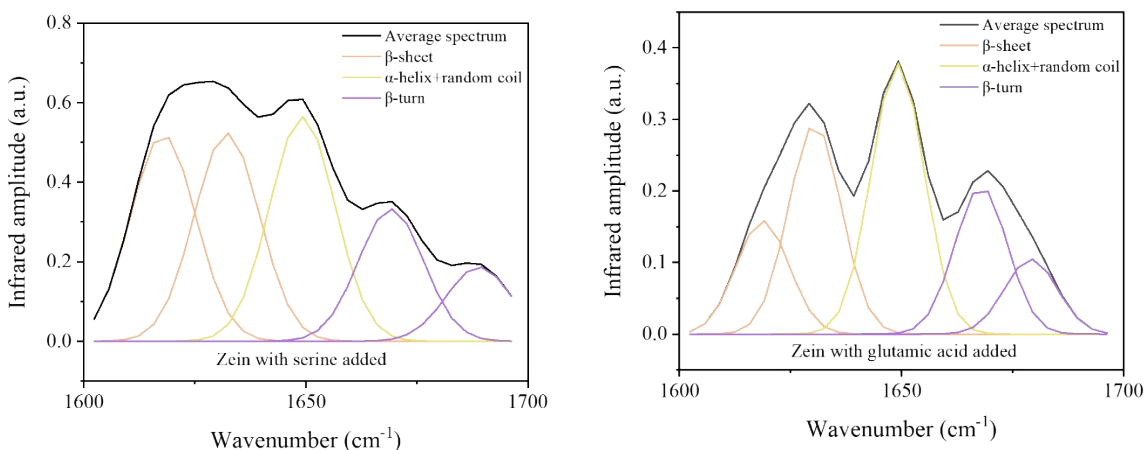

Figure S1. Second derivative of the ATR-FTIR spectra of zein-serine and zein-glutamate complex particles.

## Fluorescence microscopy.

The emulsion droplets stabilized by zein and zein complex particles were observed using a fluorescence microscope (Nikon 80i Fluorescence Microscope), where corn oil was stained with Nile Red, and zein with FITC. Specifically, zein and zein complex particles (15 mg/mL) was first incubated with FITC, then mixed with corn oil pre-stained with Nile Red. The volume fraction of oil was 30% of the total sample volume. After mixing, to facilitate observation, the emulsion was manually shaken to achieve relatively larger droplets.

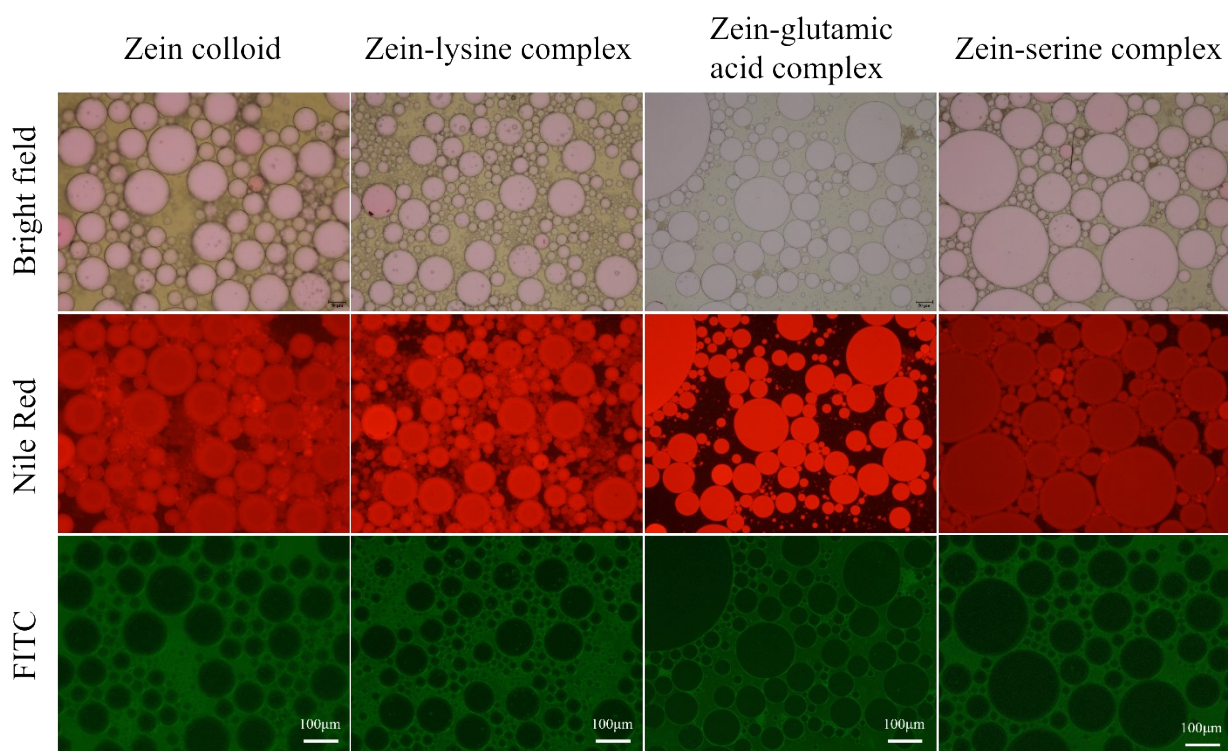

Figure S2. Fluorescence microscopy images of an emulsion stabilized by zein and zein complex particles.
